# Supplementary material for: Carotid Artery Disease in Subjects with Type 2 Diabetes: Risk Factors and Biomarkers
Source: MDPI journal article supplement (doi:10.3390/jcm11010072), 2021-12-24
Supplement: s1 [file s1]

**Table S1.** Clinical and laboratory parameters evaluated as risk factors for CA and CAS.

|    | Parameter                                         | Units/Variant                                                                    |
|----|---------------------------------------------------|----------------------------------------------------------------------------------|
| 1  | Age                                               | years                                                                            |
| 2  | Sex                                               | man/woman                                                                        |
| 3  | Height                                            | cm                                                                               |
| 4  | Weight                                            | kg                                                                               |
| 5  | BMI                                               | kg/m2                                                                            |
| 6  | Waist circumference                               | cm                                                                               |
| 7  | Hip circumference                                 | cm                                                                               |
| 8  | WHR                                               | -                                                                                |
| 9  | Current smoking                                   | no/yes                                                                           |
| 10 | Diabetes duration since diagnosis                 | years                                                                            |
| 11 | Metformin                                         | no/yes                                                                           |
| 12 | Sulphonylurea                                     | no/yes                                                                           |
| 13 | DPP-4 inhibitor                                   | no/yes                                                                           |
| 14 | GLP-1 receptor agonist                            | no/yes                                                                           |
| 15 | SGLT2 inhibitor                                   | no/yes                                                                           |
| 16 | Insulin                                           | no/yes                                                                           |
| 17 | Insulin regimen                                   | 1: basal insulin only<br>2: premixed insulin<br>3: basal-bolus insulin treatment |
| 18 | Duration of insulin treatment                     | no/yes                                                                           |
| 19 | Daily insulin dose                                | IU                                                                               |
| 20 | Daily insulin dose                                | IU/kg                                                                            |
| 21 | Diabetic retinopathy                              | no/yes                                                                           |
| 22 | Diabetic retinopathy                              | 1: non-proliferative<br>2: proliferative                                         |
| 23 | CKD                                               | no/yes                                                                           |
| 24 | CKD, stage                                        | C0-C3                                                                            |
| 25 | PAD                                               | no/yes                                                                           |
| 26 | Diabetic neuropathy, peripheral                   | no/yes                                                                           |
| 27 | Diabetic neuropathy, autonomic                    | no/yes                                                                           |
| 28 | Valsalva maneuver ratio                           | -                                                                                |
| 29 | Deep breathing test                               | bpm                                                                              |
| 30 | Diabetic foot                                     | no/yes                                                                           |
| 31 | Limb amputation in medical history                | no/yes                                                                           |
| 32 | NAFLD                                             | no/yes                                                                           |
| 33 | Dislipidemia                                      | no/yes                                                                           |
| 34 | Dislipidemia treatment                            | no/yes                                                                           |
| 35 | Treatment with statin(s)/fibrate(s)               | 1: statin(s)<br>2: fibrate(s)                                                    |
| 36 | Obesity                                           | no/yes                                                                           |
| 37 | Obesity, categories                               | 0-3                                                                              |
| 38 | Arterial hypertension                             | no/yes                                                                           |
| 39 | Duration of arterial hypertension since diagnosis | years                                                                            |
| 40 | Antihypertensive therapy                          | no/yes                                                                           |
| 41 | Arterial hypertension, stage                      | 0-3                                                                              |
| 42 | ACE inhibitor                                     | no/yes                                                                           |
| 43 | Angiotensin II receptor blocker                   | no/yes                                                                           |
| 44 | Diuretic(s)                                       | no/yes                                                                           |
| 45 | Beta-blocker                                      | no/yes                                                                           |

|    |                                                |                       |
|----|------------------------------------------------|-----------------------|
| 46 | Calcium channel blocker                        | no/yes                |
| 47 | Centrally acting antihypertensive drug(s)      | no/yes                |
| 48 | CAD                                            | no/yes                |
| 49 | Angina, classes                                | 0-4                   |
| 50 | Heart failure                                  | no/yes                |
| 51 | Heart failure, classes                         | 0-4                   |
| 52 | Myocardial revascularizaion in medical history | no/yes                |
| 53 | Myocardial infarction in medical history       | no/yes                |
| 54 | Stroke in medical history                      | no/yes                |
| 55 | Antiplatelet therapy                           | no/yes                |
| 56 | Menopause                                      | no/yes/not applicable |
| 57 | Time since menopause                           | years                 |
| 58 | Age of menopause                               | years                 |
| 59 | HbA1c                                          | %                     |
| 60 | HbA1c                                          | mmol/mol              |
| 61 | Mean glucose, fasting                          | mmol/L                |
| 62 | Mean glucose, 2-h postprandial                 | mmol/L                |
| 63 | Glucose, standard deviation                    | mmol/L                |
| 64 | MAGE                                           | mmol/L                |
| 65 | HBGI                                           | a.u.                  |
| 66 | LBGI                                           | a.u.                  |
| 67 | Total cholesterol                              | mmol/L                |
| 68 | LDL-cholesterol                                | mmol/L                |
| 69 | HDL-cholesterol                                | mmol/L                |
| 70 | Triglycerides                                  | mmol/L                |
| 71 | Uric acid                                      | μmol/L                |
| 72 | Serum creatinine                               | μmol/L                |
| 73 | eGFR                                           | ml/min/1.73 m2        |
| 74 | Albuminuria                                    | mg/day                |
| 75 | UACR                                           | mg/mmol               |
| 76 | Proteinuria                                    | mg/day                |
| 77 | Hemoglobin                                     | g/L                   |
| 78 | RBCs                                           | ×10 <sup>12</sup> /L  |
| 79 | WBCs                                           | ×10 <sup>9</sup> /L   |
| 80 | Neutrophils, abs.                              | ×10 <sup>9</sup> /L   |
| 81 | Neutrophils, %                                 | -                     |
| 82 | Lymphocytes, abs.                              | ×10 <sup>9</sup> /L   |
| 83 | Lymphocytes, %                                 | -                     |
| 84 | Neutrophil-to-lymphocyte ratio                 | -                     |
| 85 | Monocytes, abs.                                | ×10 <sup>9</sup> /L   |
| 86 | Monocytes, %                                   | -                     |
| 87 | Eosinophils, abs.                              | ×10 <sup>9</sup> /L   |
| 88 | Eosinophils, %                                 | -                     |
| 89 | Basophils, abs.                                | ×10 <sup>9</sup> /L   |
| 90 | Basophils, %                                   | -                     |
| 91 | Platelets                                      | ×10 <sup>9</sup> /L   |
| 92 | Erythrocyte sedimentation rate                 | mm/h                  |
| 93 | Fibrinogen                                     | mmol/L                |
| 94 | SFMC                                           | mg/dL                 |
| 95 | D-dimer                                        | ng/mL                 |

BMI, body mass index; CA, carotid atherosclerosis; CAS, carotid artery stenosis; CKD, chronic kidney disease; eGFR, estimated glomerular filtration rate; HBGI, high blood glucose index; HDL, high density lipoproteins; LBGI, low blood glucose index; LDL, low density lipoproteins; MAGE, mean amplitude of glycemic excursions; NAFLD, non-

alcoholic fatty liver disease; PAD, peripheral artery disease; SFMC, soluble fibrin monomer complex; RBCs, red blood cells; SGLT2, sodium glucose cotransporter 2; T2D, type 2 diabetes; UACR, urinary albumin-to-creatinine ratio; WBCs, white blood cells; WHR, waist-to-hip ratio.
